# Supplementary material for: Sex-Specific Associations of the Plasma-Proteome with incident Coronary Artery Disease
Source: bioRxiv or medRxiv preprint supplement (doi:10.1101/2024.02.17.24302702), 2024-02-18
Supplement: Supplementary file [file media-2.pdf]

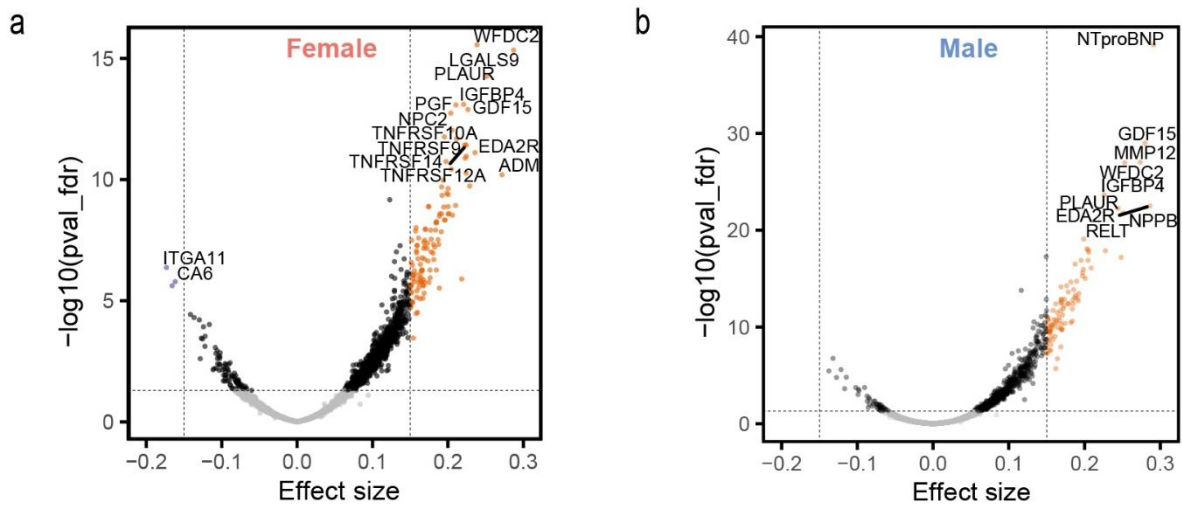

**Supplementary Figure 1. Sex-specific proteomic associations for incident CAD.** (a) Female- and (b) male-specific volcano plots representing the effect size of combined-sex plasma-proteomic profiles for CAD ( $\text{FDR} < 0.05$ ,  $\text{abs}(\beta) \geq 0.15$ ). Orange and purple dots respectively denote positive and negative significant associations with incident CAD. The proteins were part of the Cardiometabolic, Cardiometabolic\_II, Inflammation, Inflammation\_II, Neurology, Neurology\_II, Oncology, and Oncology\_II panels of the Olink Explore 3072 platform

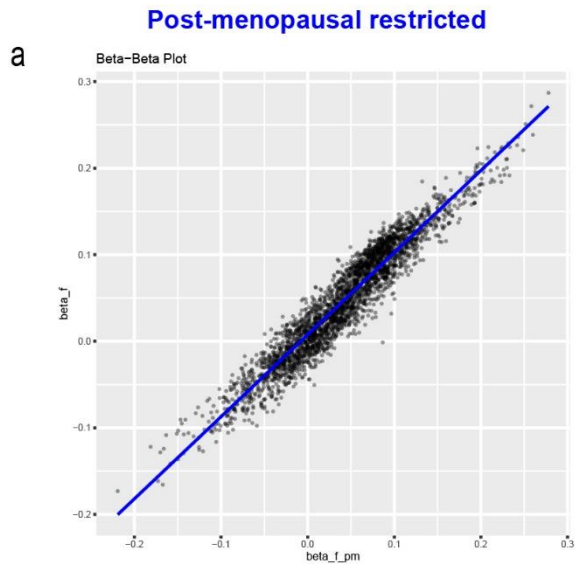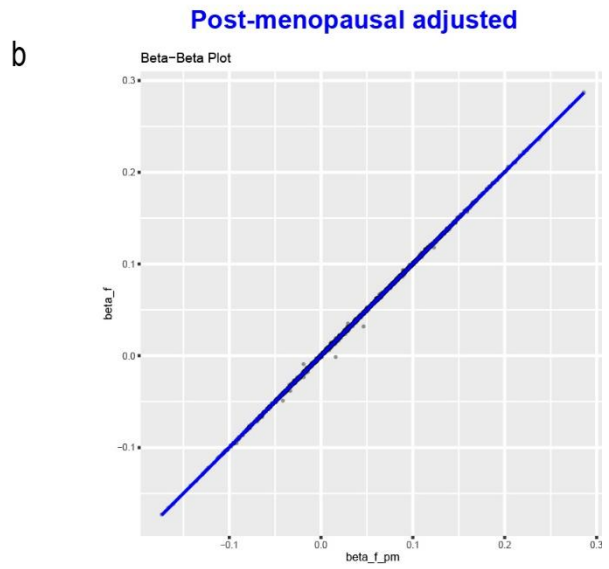

**Supplementary Figure 2. Post-menopausal analyses for protein associations with CAD.** Beta-beta plots for restriction (a) and (b) adjustment of women for postmenopausal status, relative to the non-adapted female-specific model.
